# Supplementary material for: The Evolution and Scope of Cardiac Amyloidosis Research: A Bibliometric Analysis of Echocardiography
Source: Research Square preprint supplement (doi:10.21203/rs.3.rs-4050810/v1), 2024-03-13
Supplement: Supplementary file 1 [file d45e7da880908816296ad614.docx]

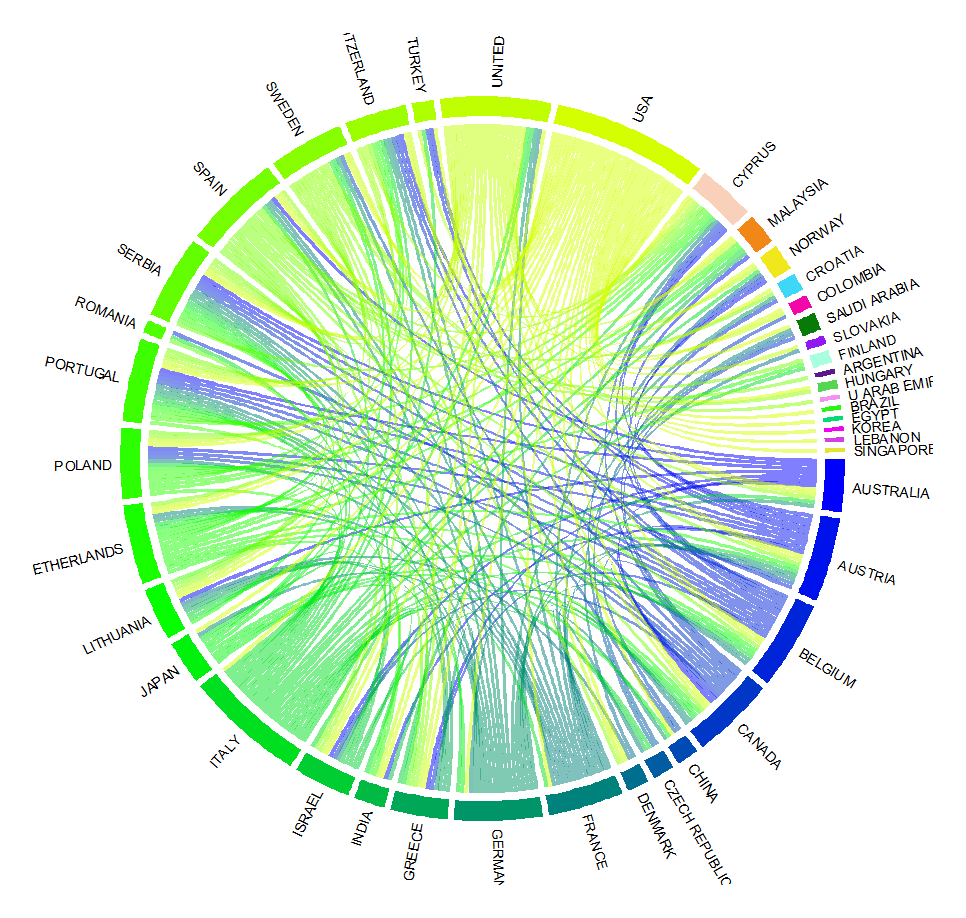


**Fig** S1. International collaboration analysis based on CA on echocardiography publications


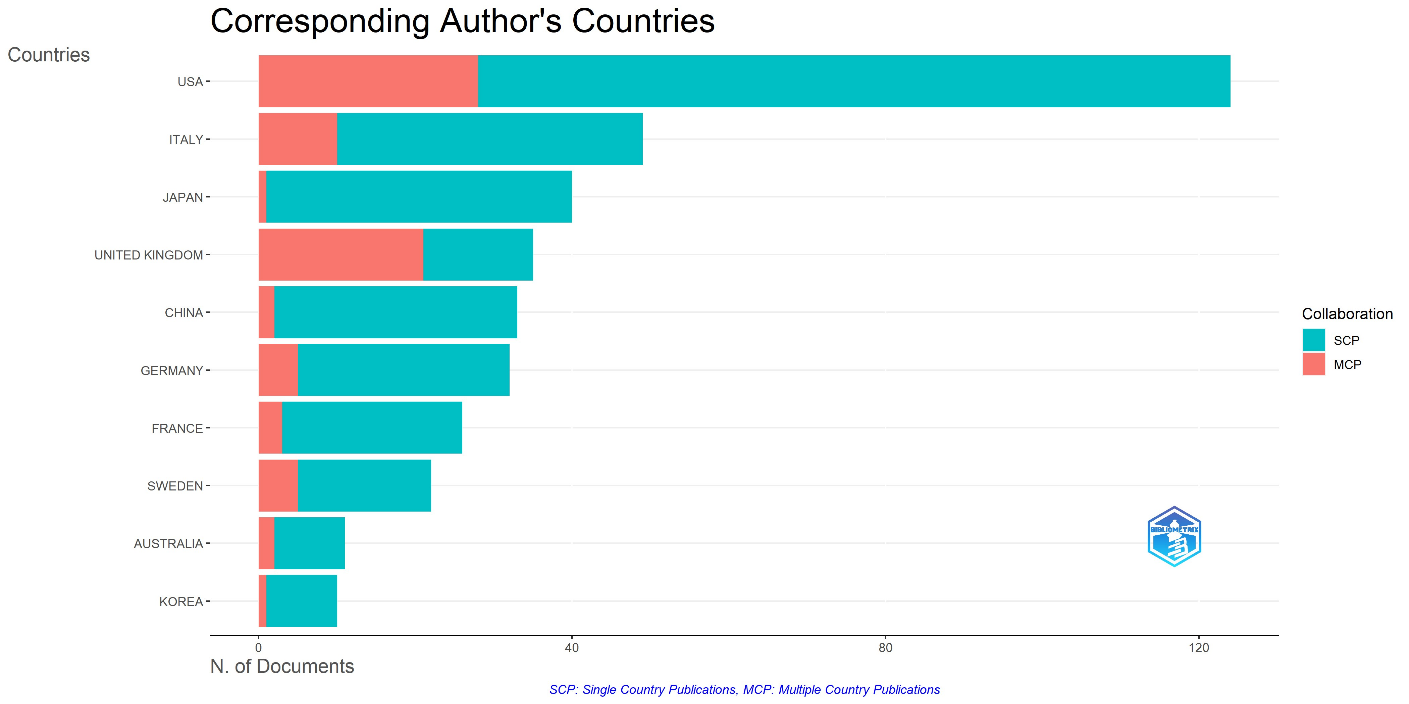


**Fig** S2. International collaboration analysis based on CA on echocardiography publications


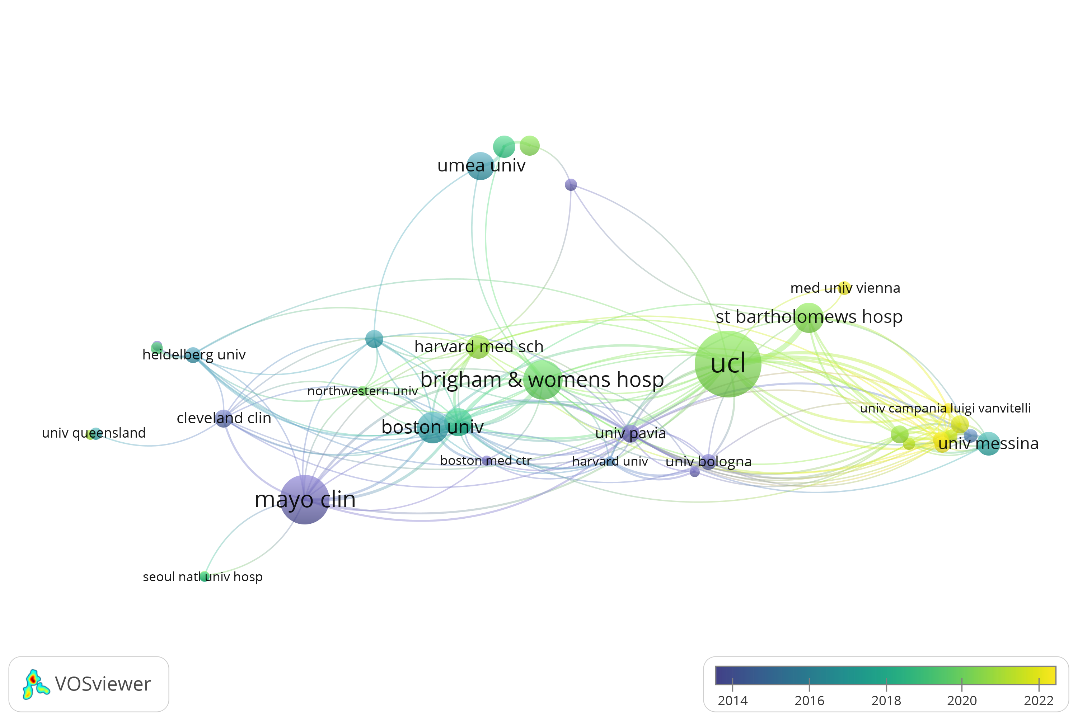


**Fig** S3. Overlay visualization map of worldwide institutions co-authorship analysis


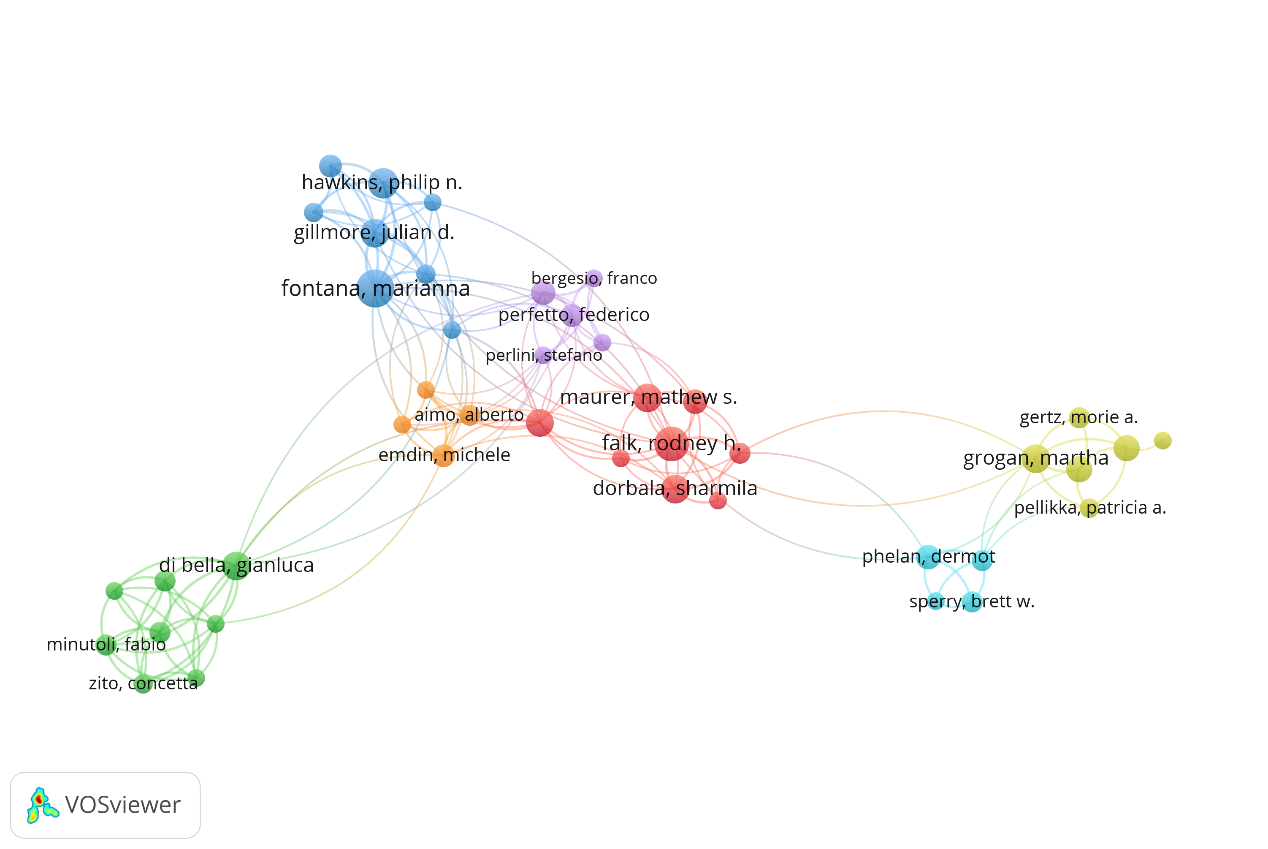


**Fig** S4. Network visualization map of author co-authorship analysis
